# Supplementary material for: TGF-β-dependent reprogramming of amino acid metabolism induces epithelial–mesenchymal transition in non-small cell lung cancers
Source: PubMed Central journal article supplement (PMC8225889; doi:10.1038/s42003-021-02323-7), 2021-06-24
Supplement: 42003_2021_2323_MOESM3_ESM.pdf [file 42003_2021_2323_MOESM3_ESM.pdf]

## **Description of Additional Supplementary Files**

**File name:** Supplementary Data 1

**Description:** Levels of metabolites in TGF- $\beta$ -treated A549 cells.

**File name:** Supplementary Data 2

**Description:** Levels of metabolites in TGF- $\beta$ -treated HCC827 cells.

**File name:** Supplementary Data 3

**Description:** Levels of metabolites in TGF- $\beta$ -treated H358 cells.

**File name:** Supplementary Data 4

**Description:** Metabolic pathways that were altered by TGF- $\beta$  in A549 cells.

**File name:** Supplementary Data 5

**Description:** Metabolic pathways that were altered by TGF- $\beta$  in HCC827 cells.

**File name:** Supplementary Data 6

**Description:** Metabolic pathways that were altered by TGF- $\beta$  in H358 cells.

**File name:** Supplementary Data 7

**Description:** Levels of metabolites in A549 cells treated with TGF- $\beta$  for 24, 48, and 72 h.

**File name:** Supplementary Data 8

**Description:** Levels of metabolites in the P4HA3-knockdown A549 cells stimulated with or without TGF- $\beta$ .

**File name:** Supplementary Data 9

**Description:** Levels of metabolites in tumors derived from P4HA3-knockdown A549 cells.

**File name:** Supplementary Data 10

**Description:** List of amino acids.

**File name:** Supplementary Data 11

**Description:** Primer sequences.

**File name:** Supplementary Data 12

**Description:** Source data underlying the graphs.
